# Supplementary material for: Experimental and theoretical studies of H2O oxidation by neutral Ti2O4,5 clusters under visible light irradiation
Source: Royal Society of Chemistry journal article supplement (doi:10.1039/c4cp00097h), 2014-01-01
Supplement: c4cp00097h1.pdf [file c4cp00097h1.pdf]

**Experimental and theoretical studies of H<sub>2</sub>O oxidation by neutral Ti<sub>2</sub>O<sub>4,5</sub> clusters  
under visible light irradiation**

*Shi Yin, Elliot R. Bernstein\**

Department of Chemistry, NSF ERC for Extreme Ultraviolet Science and Technology, Colorado State  
University, Fort Collins, CO 80523, USA

\* Corresponding Author. E-mail: [erb@lamar.colostate.edu](mailto:erb@lamar.colostate.edu).

**Table SI-1.** Cartesian Coordinates for Optimized Geometries (Å), Total Energies at 0 K ( $E_{0K}$ , a.u.) and Zero Point Correction Energies (ZPCE, a.u.) at B3LYP/TZVP Level. For the conical intersection ( $S_1/S_0$ )<sub>CI</sub>, Calculations Are at CASSCF(10, 7)/6-31g(d) Level, and Its Cartesian Coordinates for Optimized Geometries (Å) and Eigenvalues of CI Matrix of Ground State and First Excited State Are Given.

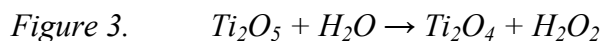

|             |                                             |             |             |
|-------------|---------------------------------------------|-------------|-------------|
| $^1Ti_2O_5$ | $E_{0K} = -2075.40787183$ ; ZPCE = 0.016773 |             |             |
| Ti          | -1.35732300                                 | 0.20716700  | -0.03670000 |
| O           | -1.22325500                                 | 2.03157100  | 0.16692300  |
| O           | 0.47113000                                  | 0.19081700  | 0.17004100  |
| Ti          | 0.63725400                                  | 2.04528800  | 0.31816600  |
| O           | -2.58957400                                 | -0.92813500 | -0.80104500 |
| O           | -2.58838900                                 | -0.92358200 | 0.67226700  |
| O           | 1.36354300                                  | 2.71412200  | -0.96998600 |

|          |                                             |            |            |
|----------|---------------------------------------------|------------|------------|
| $^1H_2O$ | $E_{0K} = -76.4606225962$ ; ZPCE = 0.021187 |            |            |
| O        | -0.04155000                                 | 0.02668600 | 0.00000000 |
| H        | 0.92028000                                  | 0.06430400 | 0.00000000 |
| H        | -0.32716000                                 | 0.94591000 | 0.00000000 |

|    |                                             |             |             |
|----|---------------------------------------------|-------------|-------------|
| G1 | $E_{0K} = -2151.92133134$ ; ZPCE = 0.041470 |             |             |
| Ti | -1.46922700                                 | 0.11753500  | -0.14661500 |
| O  | -1.32338400                                 | 1.94107700  | -0.23831100 |
| O  | 0.30420300                                  | 0.10601100  | 0.30799700  |
| Ti | 0.51613400                                  | 1.97738800  | 0.17882700  |
| O  | -2.64058900                                 | -1.12943700 | -0.84719500 |
| O  | -2.81712400                                 | -0.85738100 | 0.59468900  |
| O  | 1.48290800                                  | 2.47277000  | -1.03994300 |
| O  | 1.23750200                                  | 3.11762200  | 1.84212900  |
| H  | 1.97076200                                  | 3.72852300  | 1.69405300  |
| H  | 0.96462500                                  | 3.16710500  | 2.76581200  |

|       |                                             |             |             |
|-------|---------------------------------------------|-------------|-------------|
| G1/G2 | $E_{0K} = -2151.89661603$ ; ZPCE = 0.041934 |             |             |
| Ti    | -1.00315700                                 | -0.29766400 | -0.00000400 |
| O     | 0.32565200                                  | -0.35046300 | -1.27300300 |
| O     | 0.32565100                                  | -0.35050400 | 1.27299400  |
| Ti    | 1.63698700                                  | 0.07024200  | 0.00000500  |
| O     | -2.68861700                                 | -1.02509600 | -0.00000400 |
| O     | -2.68902100                                 | 0.44510600  | 0.00000500  |

|   |             |             |             |
|---|-------------|-------------|-------------|
| O | 3.02957000  | -0.77312800 | -0.00000800 |
| O | 0.01575600  | 2.04178300  | 0.00001300  |
| H | -0.24809300 | 2.55084100  | -0.77935500 |
| H | -0.24810400 | 2.55086500  | 0.77936100  |

G2  $E_{0K} = -2151.90350059$ ; ZPCE = 0.042052

|    |             |             |             |
|----|-------------|-------------|-------------|
| Ti | -1.26856100 | 0.07402700  | -0.11413400 |
| O  | -0.70591500 | 1.46034400  | 0.97112800  |
| O  | 0.30332700  | 0.39108200  | -1.06100300 |
| Ti | 0.83073600  | 1.83149900  | -0.00426100 |
| O  | -2.90109500 | 0.22861000  | -0.89560400 |
| O  | -2.77349600 | -1.05291400 | -0.20986700 |
| O  | 0.82950000  | 3.27138000  | -0.76304700 |
| O  | -0.37791000 | -1.70698700 | 0.81802800  |
| H  | 0.39338000  | -2.05732700 | 0.35475500  |
| H  | -1.02664700 | -2.42074500 | 0.89168400  |

G2/G3  $E_{0K} = -2151.88865566$ ; ZPCE = 0.038224

|    |             |             |             |
|----|-------------|-------------|-------------|
| Ti | 0.78116400  | -0.00972900 | 0.07663100  |
| O  | -0.58464800 | -0.33724000 | 1.24707100  |
| O  | -0.52917200 | 0.67804900  | -1.02783700 |
| Ti | -1.93272900 | 0.32262600  | 0.13742200  |
| O  | 1.74766700  | -1.33120800 | -0.73775800 |
| O  | 2.62788800  | -0.82008600 | 0.32159000  |
| O  | -2.96408900 | -0.80936900 | -0.39976500 |
| O  | 2.21797300  | 1.43619800  | 0.07168800  |
| H  | 2.38183700  | 2.14352800  | -0.56021700 |
| H  | 2.82763400  | 0.44197400  | 0.05114500  |

G3  $E_{0K} = -2151.92424059$ ; ZPCE = 0.041390

|    |             |             |             |
|----|-------------|-------------|-------------|
| Ti | 0.85248900  | 0.26287500  | -0.18491900 |
| O  | -0.40305800 | 0.01058100  | 1.14912100  |
| O  | -0.58319700 | 0.59444200  | -1.26033200 |
| Ti | -1.86832600 | 0.31395800  | 0.06747200  |
| O  | 1.76919400  | -1.26159500 | -0.82328000 |
| O  | 2.47394700  | -1.11291500 | 0.45914400  |
| O  | -2.82429300 | -0.98179300 | -0.15381000 |
| O  | 1.93406200  | 1.72981800  | -0.06795800 |
| H  | 1.84181000  | 2.68215500  | -0.14094000 |
| H  | 3.34173500  | -0.77022900 | 0.18849700  |

G3/G4  $E_{0K} = -2151.82097887$ ; ZPCE = 0.039366

|    |             |             |             |
|----|-------------|-------------|-------------|
| Ti | 0.77487300  | -0.17502400 | -0.08965200 |
| O  | -0.60105500 | 0.07494100  | 1.11159000  |
| O  | -0.49723200 | 0.10139800  | -1.38504100 |
| Ti | -1.89736700 | 0.37892200  | -0.18776100 |
| O  | 1.47153300  | -1.78689900 | -0.12019400 |
| O  | 2.73091200  | -0.05637300 | 0.10290100  |
| O  | -3.09008700 | -0.72335300 | -0.24638700 |
| O  | 2.03858900  | 1.70329800  | -0.06695000 |
| H  | 2.28839100  | 2.08715400  | 0.78779300  |
| H  | 3.31580600  | -0.13676800 | -0.67330500 |

G4  $E_{0K} = -2151.86143453$ ; ZPCE = 0.042703

|    |             |             |             |
|----|-------------|-------------|-------------|
| Ti | -0.69050400 | 0.44881300  | 0.05250300  |
| O  | 0.64737000  | -0.02489200 | 1.27652900  |
| O  | 0.52151700  | -0.14231000 | -1.24542900 |
| Ti | 1.85377500  | -0.56274600 | -0.02589300 |
| O  | -1.13424500 | 2.02855500  | -0.01844500 |
| O  | -2.74833200 | -0.21094300 | 0.25372600  |
| O  | 3.23177900  | 0.30668600  | -0.13583500 |
| O  | -3.16211300 | -1.54850300 | -0.12967800 |
| H  | -3.51820400 | -1.87332300 | 0.71451500  |
| H  | -3.39201000 | 0.38222800  | -0.16913500 |

G4/G5  $E_{0K} = -2151.85259661$ ; ZPCE = 0.041957

|    |             |             |             |
|----|-------------|-------------|-------------|
| Ti | -0.71964300 | 0.46364900  | 0.02667200  |
| O  | 0.61416700  | 0.00206000  | 1.28078700  |
| O  | 0.52807800  | -0.08499700 | -1.27702400 |
| Ti | 1.84827300  | -0.48232800 | -0.02558900 |
| O  | -1.07028600 | 2.06168000  | -0.03150000 |
| O  | -2.77490300 | -0.20255700 | 0.24405200  |
| O  | 3.45779400  | -0.84662900 | -0.05852500 |
| O  | -3.12957900 | -1.55907800 | -0.12789100 |
| H  | -3.43299100 | -1.90658000 | 0.72832600  |
| H  | -3.46456400 | 0.35214700  | -0.15730900 |

G5  $E_{0K} = -2151.87059193$ ; ZPCE = 0.042637

|    |             |             |             |
|----|-------------|-------------|-------------|
| Ti | -0.71004700 | 0.55896300  | -0.01222100 |
| O  | 0.54357700  | 0.01577100  | 1.26364700  |
| O  | 0.53924200  | -0.06747900 | -1.25371400 |
| Ti | 1.75687100  | -0.61884000 | 0.02114800  |

|   |             |             |             |
|---|-------------|-------------|-------------|
| O | -1.03037700 | 2.16808200  | -0.06709600 |
| O | -2.72856700 | -0.18899100 | 0.24354200  |
| O | 1.99263700  | -2.23729100 | 0.08009800  |
| O | -3.00854900 | -1.55250300 | -0.16588100 |
| H | -3.06317300 | -1.99065800 | 0.70071100  |
| H | -3.49767000 | 0.31533700  | -0.06590900 |

${}^1\text{Ti}_2\text{O}_4$   $E_{0K} = -2000.21758572$ ; ZPCE = 0.014185

|    |             |             |             |
|----|-------------|-------------|-------------|
| Ti | -1.44338000 | 0.09794800  | -0.02914900 |
| O  | -1.32271600 | 1.94243700  | 0.11229100  |
| O  | 0.39713900  | 0.11944100  | 0.19362600  |
| Ti | 0.51761500  | 1.96399000  | 0.33445900  |
| O  | -2.25098300 | -0.60805200 | 1.19901800  |
| O  | 1.32321900  | 2.66895200  | -0.89566900 |

${}^1\text{H}_2\text{O}_2$   $E_{0K} = -151.611797192$ ; ZPCE = 0.026267

|   |             |             |             |
|---|-------------|-------------|-------------|
| O | -0.12571200 | -0.05227000 | -0.12707000 |
| H | 0.72452900  | -0.07836400 | -0.58864200 |
| O | -0.37354200 | 1.38454100  | -0.12704600 |
| H | -1.22369800 | 1.41066500  | -0.58877200 |

E1  $E_{0K} = -2151.85554739$ ; ZPCE = 0.041489

|    |             |             |             |
|----|-------------|-------------|-------------|
| Ti | -1.42767300 | 0.17352700  | -0.08807700 |
| O  | -1.29693500 | 1.96153600  | -0.23797700 |
| O  | 0.32674300  | 0.12795900  | 0.30420200  |
| Ti | 0.56185700  | 2.00560800  | 0.14463800  |
| O  | -2.72075500 | -1.18472400 | -0.79682400 |
| O  | -2.93069600 | -0.97808400 | 0.53334100  |
| O  | 1.53523100  | 2.50996000  | -1.06414100 |
| O  | 1.24874000  | 3.12750200  | 1.83656100  |
| H  | 1.98014600  | 3.74851900  | 1.72620100  |
| H  | 0.94915100  | 3.14941000  | 2.75352000  |

E1/E2  $E_{0K} = -2151.83366848$ ; ZPCE = 0.041633

|    |             |             |             |
|----|-------------|-------------|-------------|
| Ti | -0.97534300 | -0.31665100 | -0.01249800 |
| O  | 0.16932400  | -0.17576700 | -1.30319100 |
| O  | 0.17833200  | -0.44147600 | 1.27392800  |
| Ti | 1.71356600  | 0.03400700  | 0.03464300  |
| O  | -2.84905800 | -0.92120200 | -0.05567000 |
| O  | -2.79505600 | 0.45289100  | 0.04553900  |
| O  | 2.97153700  | -0.98039100 | -0.08681700 |

|   |            |            |             |
|---|------------|------------|-------------|
| O | 0.26866600 | 2.16558500 | 0.06705300  |
| H | 0.07582800 | 2.59769000 | -0.77676800 |
| H | 0.13329900 | 2.82334800 | 0.76284600  |

E2  $E_{0K} = -2151.85354884$ ; ZPCE = 0.042280

|    |             |             |             |
|----|-------------|-------------|-------------|
| Ti | 0.89874800  | -0.10374100 | 0.06816500  |
| O  | -0.31471700 | -0.01633600 | 1.32078800  |
| O  | -0.24715500 | 0.36809400  | -1.19304300 |
| Ti | -1.78337600 | 0.40475800  | 0.04613700  |
| O  | 1.77201000  | -1.82292100 | -0.16455100 |
| O  | 2.74246600  | -0.90096800 | 0.15827700  |
| O  | -3.00368500 | -0.64595400 | -0.15825200 |
| O  | 1.99835000  | 1.72867900  | 0.01992300  |
| H  | 1.67359700  | 2.47829700  | -0.49403700 |
| H  | 2.96086300  | 1.68524700  | -0.04980400 |

E2/E3  $E_{0K} = -2151.82922208$ ; ZPCE = 0.040438

|    |             |             |             |
|----|-------------|-------------|-------------|
| Ti | 0.69178900  | 0.04028400  | 0.02989100  |
| O  | -0.51850700 | 0.13884900  | 1.28327800  |
| O  | -0.46701700 | 0.30164300  | -1.24207500 |
| Ti | -2.02219100 | 0.30563500  | 0.00824900  |
| O  | 1.83837400  | -1.49432300 | -0.06213300 |
| O  | 3.04596100  | -0.77762500 | -0.02753500 |
| O  | -3.02117400 | -0.96104200 | -0.07837900 |
| O  | 2.13398100  | 1.47114900  | 0.06905100  |
| H  | 2.35030200  | 2.30493900  | -0.35920500 |
| H  | 2.82558400  | 0.65564600  | -0.01753900 |

E3/E4  $E_{0K} = -2151.78242914$ ; ZPCE = 0.037991

|    |             |             |             |
|----|-------------|-------------|-------------|
| Ti | 0.87764500  | -0.17853300 | -0.00361000 |
| O  | -0.48811500 | -0.01096700 | 1.24104200  |
| O  | -0.49559200 | -0.13354300 | -1.24271800 |
| Ti | -1.83080900 | 0.04244400  | -0.00020100 |
| O  | 1.70602900  | -1.73054900 | 0.04129600  |
| O  | 2.82916600  | 0.04109900  | 0.12602800  |
| O  | -3.65370300 | 0.19419800  | 0.00372100  |
| O  | 2.01707600  | 1.74060500  | -0.15653600 |
| H  | 2.25089000  | 2.24048500  | 0.64108000  |
| H  | 3.39984200  | -0.05326000 | -0.65990300 |

E4  $E_{0K} = -2151.79296851$ ; ZPCE = 0.041533

|    |             |             |             |
|----|-------------|-------------|-------------|
| Ti | -0.83258400 | 0.65626300  | 0.00424300  |
| O  | 0.54569300  | 0.27988600  | 1.23966900  |
| O  | 0.49279500  | 0.22340000  | -1.26968800 |
| Ti | 1.78051700  | -0.10769400 | -0.03458100 |
| O  | -1.38295100 | 2.19659000  | -0.02955100 |
| O  | -2.78420900 | -0.25617500 | 0.23514800  |
| O  | 3.51724800  | -0.72277700 | -0.05453600 |
| O  | -2.99270700 | -1.64250100 | -0.13704100 |
| H  | -3.17505700 | -2.03687200 | 0.73312600  |
| H  | -3.55971000 | 0.21344500  | -0.11393100 |

$^1\text{Ti}_2\text{O}_4^*$   $E_{0K} = -2000.11712627$ ; ZPCE = 0.014224

|    |             |             |             |
|----|-------------|-------------|-------------|
| Ti | -0.07141300 | -0.39784600 | -0.08641400 |
| O  | -0.05926400 | 0.33419900  | 1.84060900  |
| O  | 1.85680200  | 0.33083500  | 0.10300700  |
| Ti | 1.62965200  | 0.69270500  | 1.77481300  |
| O  | -0.67646100 | -1.76492300 | -0.71973300 |
| O  | 2.85998700  | 0.80783000  | 3.12245000  |

$(S_1/S_0)_{CI}$

|    |             |             |             |
|----|-------------|-------------|-------------|
| Ti | 0.36577900  | -0.37736300 | -0.18413200 |
| O  | -0.17580000 | 0.08787700  | 1.47937800  |
| O  | 2.02239900  | -0.26600200 | 0.47933800  |
| Ti | 1.51132300  | 0.20912100  | 2.18809000  |
| O  | 0.19772000  | 0.92403800  | -1.52716600 |
| O  | -2.03444400 | -0.01559800 | -0.92621200 |
| O  | 2.03145700  | 1.51691800  | 2.90579600  |
| O  | 0.04024700  | -2.09886600 | -0.61651900 |
| H  | -0.80524300 | -2.49601800 | -0.77764200 |
| H  | -2.14811200 | 0.62674800  | -1.63102000 |

## EIGENVALUES OF CI MATRIX

- ( 1) EIGENVALUE -2147.1979951205  
( 2) EIGENVALUE -2147.1978220682

**Table SI-2.** Cartesian Coordinates for Optimized Geometries (Å), Total Energies at 0 K ( $E_{0K}$ , a.u.) and Zero Point Correction Energies (ZPCE, a.u.) at B3LYP/TZVP Level.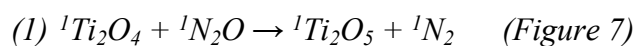

|                             |                                             |             |             |
|-----------------------------|---------------------------------------------|-------------|-------------|
| ${}^1\text{Ti}_2\text{O}_4$ | $E_{0K} = -2000.21758572$ ; ZPCE = 0.014185 |             |             |
| Ti                          | -1.44338000                                 | 0.09794800  | -0.02914900 |
| O                           | -1.32271600                                 | 1.94243700  | 0.11229100  |
| O                           | 0.39713900                                  | 0.11944100  | 0.19362600  |
| Ti                          | 0.51761500                                  | 1.96399000  | 0.33445900  |
| O                           | -2.25098300                                 | -0.60805200 | 1.19901800  |
| O                           | 1.32321900                                  | 2.66895200  | -0.89566900 |

|                          |                                             |             |            |
|--------------------------|---------------------------------------------|-------------|------------|
| ${}^1\text{N}_2\text{O}$ | $E_{0K} = -184.730161419$ ; ZPCE = 0.011050 |             |            |
| N                        | -0.61783900                                 | -1.51417900 | 0.36945600 |
| N                        | 0.50461300                                  | -1.51418000 | 0.36945700 |
| O                        | -1.80265700                                 | -1.51418000 | 0.36945700 |

|    |                                             |             |             |
|----|---------------------------------------------|-------------|-------------|
| G6 | $E_{0K} = -2184.97086582$ ; ZPCE = 0.026344 |             |             |
| Ti | -1.69427600                                 | -0.24184700 | 0.09602000  |
| O  | -1.64583500                                 | 1.55165300  | -0.42925600 |
| O  | 0.16754400                                  | -0.08640600 | 0.16226200  |
| Ti | 0.19916100                                  | 1.66296500  | -0.41726700 |
| O  | -2.45473600                                 | -0.56899400 | 1.50403800  |
| O  | 0.81653200                                  | 1.81759000  | -1.92565200 |
| O  | -2.39612500                                 | -1.12057700 | -1.85638700 |
| N  | -2.24875000                                 | -0.58397600 | -2.92501300 |
| N  | -2.13382600                                 | -0.11768400 | -3.92774700 |

|     |                                             |             |             |
|-----|---------------------------------------------|-------------|-------------|
| TS1 | $E_{0K} = -2184.91200741$ ; ZPCE = 0.023064 |             |             |
| Ti  | -0.37403400                                 | 0.51222100  | -0.00012000 |
| O   | 0.95664800                                  | 0.21426000  | -1.25329200 |
| O   | 0.95652400                                  | 0.21406100  | 1.25324600  |
| Ti  | 2.28735300                                  | -0.10839900 | 0.00008000  |
| O   | -1.13640200                                 | 2.02135800  | -0.00021600 |
| O   | 2.82416900                                  | -1.64729000 | -0.00010200 |
| O   | -2.35901900                                 | 0.31334800  | 0.00069600  |
| N   | -3.22519100                                 | -1.02307000 | 0.00038200  |
| N   | -4.20743400                                 | -1.52121100 | -0.00063400 |

|                             |                                             |  |  |
|-----------------------------|---------------------------------------------|--|--|
| ${}^1\text{Ti}_2\text{O}_5$ | $E_{0K} = -2075.40787183$ ; ZPCE = 0.016773 |  |  |
|-----------------------------|---------------------------------------------|--|--|



|    |             |             |             |
|----|-------------|-------------|-------------|
| Ti | -1.35732300 | 0.20716700  | -0.03670000 |
| O  | -1.22325500 | 2.03157100  | 0.16692300  |
| O  | 0.47113000  | 0.19081700  | 0.17004100  |
| Ti | 0.63725400  | 2.04528800  | 0.31816600  |
| O  | -2.58957400 | -0.92813500 | -0.80104500 |
| O  | -2.58838900 | -0.92358200 | 0.67226700  |
| O  | 1.36354300  | 2.71412200  | -0.96998600 |

|                |                                                    |             |            |
|----------------|----------------------------------------------------|-------------|------------|
| $^1\text{N}_2$ | $E_{0\text{K}} = -109.567199391$ ; ZPCE = 0.005610 |             |            |
| N              | -0.00986300                                        | -2.07923600 | 0.44557300 |
| N              | -1.10237800                                        | -2.07923600 | 0.44557300 |

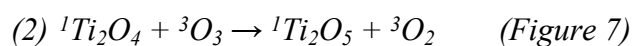

|                           |                                                    |             |             |
|---------------------------|----------------------------------------------------|-------------|-------------|
| $^1\text{Ti}_2\text{O}_4$ | $E_{0\text{K}} = -2000.21758572$ ; ZPCE = 0.014185 |             |             |
| Ti                        | -1.44338000                                        | 0.09794800  | -0.02914900 |
| O                         | -1.32271600                                        | 1.94243700  | 0.11229100  |
| O                         | 0.39713900                                         | 0.11944100  | 0.19362600  |
| Ti                        | 0.51761500                                         | 1.96399000  | 0.33445900  |
| O                         | -2.25098300                                        | -0.60805200 | 1.19901800  |
| O                         | 1.32321900                                         | 2.66895200  | -0.89566900 |

|                |                                                    |             |            |
|----------------|----------------------------------------------------|-------------|------------|
| $^3\text{O}_3$ | $E_{0\text{K}} = -225.464011856$ ; ZPCE = 0.005005 |             |            |
| O              | -0.30476400                                        | 0.11790800  | 0.00000000 |
| O              | 0.96064200                                         | -0.18386400 | 0.00000000 |
| O              | -0.87329600                                        | 1.28803600  | 0.00000000 |

|    |                                                    |             |             |
|----|----------------------------------------------------|-------------|-------------|
| G8 | $E_{0\text{K}} = -2225.75972848$ ; ZPCE = 0.020773 |             |             |
| Ti | -1.56893300                                        | -0.04400400 | -0.55459100 |
| O  | -1.42994700                                        | 1.77520200  | -0.32979000 |
| O  | 0.23229700                                         | -0.06851400 | -0.34180100 |
| Ti | 0.41342600                                         | 1.78731800  | -0.13944200 |
| O  | -2.45935800                                        | -0.83248500 | 0.87134300  |
| O  | 1.18877800                                         | 2.50675100  | -1.36829000 |
| O  | -2.21943700                                        | -0.64199800 | -2.17266200 |
| O  | -2.04739300                                        | -1.10374100 | -4.44544700 |
| O  | -1.34469600                                        | -0.91293200 | -3.46364500 |

|     |                                                    |            |            |
|-----|----------------------------------------------------|------------|------------|
| TS3 | $E_{0\text{K}} = -2225.74876604$ ; ZPCE = 0.019485 |            |            |
| Ti  | 0.29366000                                         | 0.90247800 | 0.00198200 |
| O   | -0.90630200                                        | 0.28199100 | 1.24828500 |

|    |             |             |             |
|----|-------------|-------------|-------------|
| O  | -0.92652500 | 0.33093100  | -1.25086500 |
| Ti | -2.13615100 | -0.34974400 | -0.00507900 |
| O  | 0.96739500  | 2.59611200  | -0.01355600 |
| O  | -2.23537000 | -1.96949200 | -0.03424300 |
| O  | 2.11786600  | 0.67536000  | 0.00341000  |
| O  | 3.50547700  | -1.89977000 | -0.28184300 |
| O  | 2.54431100  | -1.53514900 | 0.33732800  |

${}^1\text{Ti}_2\text{O}_5$   $E_{0K} = -2075.40787183$ ; ZPCE = 0.016773

|    |             |             |             |
|----|-------------|-------------|-------------|
| Ti | -1.35732300 | 0.20716700  | -0.03670000 |
| O  | -1.22325500 | 2.03157100  | 0.16692300  |
| O  | 0.47113000  | 0.19081700  | 0.17004100  |
| Ti | 0.63725400  | 2.04528800  | 0.31816600  |
| O  | -2.58957400 | -0.92813500 | -0.80104500 |
| O  | -2.58838900 | -0.92358200 | 0.67226700  |
| O  | 1.36354300  | 2.71412200  | -0.96998600 |

${}^3\text{O}_2$   $E_{0K} = -150.382045971$ ; ZPCE = 0.003689

|   |             |            |            |
|---|-------------|------------|------------|
| O | -0.04800900 | 0.09674900 | 0.00000000 |
| O | -0.45126700 | 1.23551400 | 0.00000000 |

(3)  ${}^1\text{Ti}_2\text{O}_4 + {}^1\text{O}_3 \rightarrow {}^1\text{Ti}_2\text{O}_5 + {}^1\text{O}_2$  (Figure 7)

${}^1\text{Ti}_2\text{O}_4$   $E_{0K} = -2000.21758572$ ; ZPCE = 0.014185

|    |             |             |             |
|----|-------------|-------------|-------------|
| Ti | -1.44338000 | 0.09794800  | -0.02914900 |
| O  | -1.32271600 | 1.94243700  | 0.11229100  |
| O  | 0.39713900  | 0.11944100  | 0.19362600  |
| Ti | 0.51761500  | 1.96399000  | 0.33445900  |
| O  | -2.25098300 | -0.60805200 | 1.19901800  |
| O  | 1.32321900  | 2.66895200  | -0.89566900 |

${}^1\text{O}_3$   $E_{0K} = -225.497982435$ ; ZPCE = 0.007166

|   |             |             |            |
|---|-------------|-------------|------------|
| O | -0.34180900 | 0.07177500  | 0.00000000 |
| O | 0.90568600  | -0.10181900 | 0.00000000 |
| O | -0.78129400 | 1.25212500  | 0.00000000 |

G7  $E_{0K} = -2225.74277525$ ; ZPCE = 0.022315

|    |             |            |             |
|----|-------------|------------|-------------|
| Ti | -1.47549000 | 0.11379800 | -0.65945200 |
| O  | -1.33601800 | 1.88300900 | -0.10162600 |
| O  | 0.36015400  | 0.06484000 | -0.43227900 |
| Ti | 0.50097900  | 1.83435700 | 0.11420800  |

|   |             |             |             |
|---|-------------|-------------|-------------|
| O | -2.31161000 | -0.87621400 | 0.37881000  |
| O | 1.31562500  | 2.78340400  | -0.93224000 |
| O | -2.29670600 | -0.45663700 | -2.55426400 |
| O | -2.29396800 | -1.57633100 | -4.40306400 |
| O | -1.69823000 | -1.30463000 | -3.35441900 |

TS2  $E_{0K} = -2225.70520441$ ; ZPCE = 0.020860

|    |             |             |             |
|----|-------------|-------------|-------------|
| Ti | -0.29963300 | 0.43769000  | -0.04684500 |
| O  | 1.19403800  | 0.67965400  | -1.09132900 |
| O  | 0.85371200  | -0.26827800 | 1.19467100  |
| Ti | 2.37835900  | -0.06659800 | 0.13928000  |
| O  | -1.26805600 | 1.81666600  | 0.37779300  |
| O  | 2.99108100  | -1.48585200 | -0.35763500 |
| O  | -2.22495100 | 0.41866100  | -0.32257800 |
| O  | -4.23550000 | -1.06778700 | 0.00178000  |
| O  | -3.02682100 | -1.11356600 | -0.05689800 |

$^1\text{Ti}_2\text{O}_5$   $E_{0K} = -2075.40787183$ ; ZPCE = 0.016773

|    |             |             |             |
|----|-------------|-------------|-------------|
| Ti | -1.35732300 | 0.20716700  | -0.03670000 |
| O  | -1.22325500 | 2.03157100  | 0.16692300  |
| O  | 0.47113000  | 0.19081700  | 0.17004100  |
| Ti | 0.63725400  | 2.04528800  | 0.31816600  |
| O  | -2.58957400 | -0.92813500 | -0.80104500 |
| O  | -2.58838900 | -0.92358200 | 0.67226700  |
| O  | 1.36354300  | 2.71412200  | -0.96998600 |

$^1\text{O}_2$   $E_{0K} = -150.320270596$ ; ZPCE = 0.003663

|   |             |            |            |
|---|-------------|------------|------------|
| O | -0.04800300 | 0.09673200 | 0.00000000 |
| O | -0.45127300 | 1.23553200 | 0.00000000 |
